# Supplementary material for: Impact of Communicating With Doctors Via Social Media on Consumers’ E-Health Literacy and Healthy Behaviors in China
Source: PubMed Central journal article supplement — Inquiry. 2020 Nov 26;57:0046958020971188. doi: 10.1177/0046958020971188 (PMC7705801; doi:10.1177/0046958020971188), 2020-11-26
Supplement: sj-pdf-1-inq-10.1177_0046958020971188.pdf [file sj-pdf-1-inq-10.1177_0046958020971188.pdf]

Table 1 Survey instrument

| Constructs                                 | Items                                                                                                                                                                                                                                                                                                                                                                                                                                                                                                                                                                                                                                   |
|--------------------------------------------|-----------------------------------------------------------------------------------------------------------------------------------------------------------------------------------------------------------------------------------------------------------------------------------------------------------------------------------------------------------------------------------------------------------------------------------------------------------------------------------------------------------------------------------------------------------------------------------------------------------------------------------------|
| Following doctors' social network accounts | How many doctors' accounts have you followed in social media?                                                                                                                                                                                                                                                                                                                                                                                                                                                                                                                                                                           |
| Reading doctors' posts                     | What is your frequency of reading doctors' posts in social media?                                                                                                                                                                                                                                                                                                                                                                                                                                                                                                                                                                       |
| Responding to doctors' posts               | What is your frequency of replying doctors' posts in social media?                                                                                                                                                                                                                                                                                                                                                                                                                                                                                                                                                                      |
| Favoring doctors' posts                    | What is your frequency of favoring doctors' posts in social media?                                                                                                                                                                                                                                                                                                                                                                                                                                                                                                                                                                      |
| Recommending doctors to others             | What is your frequency of recommending doctors who you communicated with in social media to others?                                                                                                                                                                                                                                                                                                                                                                                                                                                                                                                                     |
| e-Health literacy                          | <p>I know how to find helpful health resources on the Internet.</p> <p>I know how to use the Internet to answer my health questions.</p> <p>I know what health resources are available on the Internet.</p> <p>I know where to find helpful health resources on the Internet.</p> <p>I know how to use the health information I find on the Internet to help me.</p> <p>I have the skills I need to evaluate the health resources I find on the Internet</p> <p>I can tell high quality from low quality health resources on the Internet.</p> <p>I feel confident in using information from the Internet to make health decisions.</p> |
| Healthy behaviors                          | Copyright of this scale is held by Prof. Bernadette Mazurek Melnyk.                                                                                                                                                                                                                                                                                                                                                                                                                                                                                                                                                                     |
